# Supplementary material for: The Ortholog Conjecture Is Untestable by the Current Gene Ontology but Is Supported by RNA Sequencing Data
Source: PubMed Central journal article supplement (PMC3510086; doi:10.1371/journal.pcbi.1002784), 2012-11-29
Supplement: pcbi.1002784.s006.pdf [file pcbi.1002784.s006.pdf]

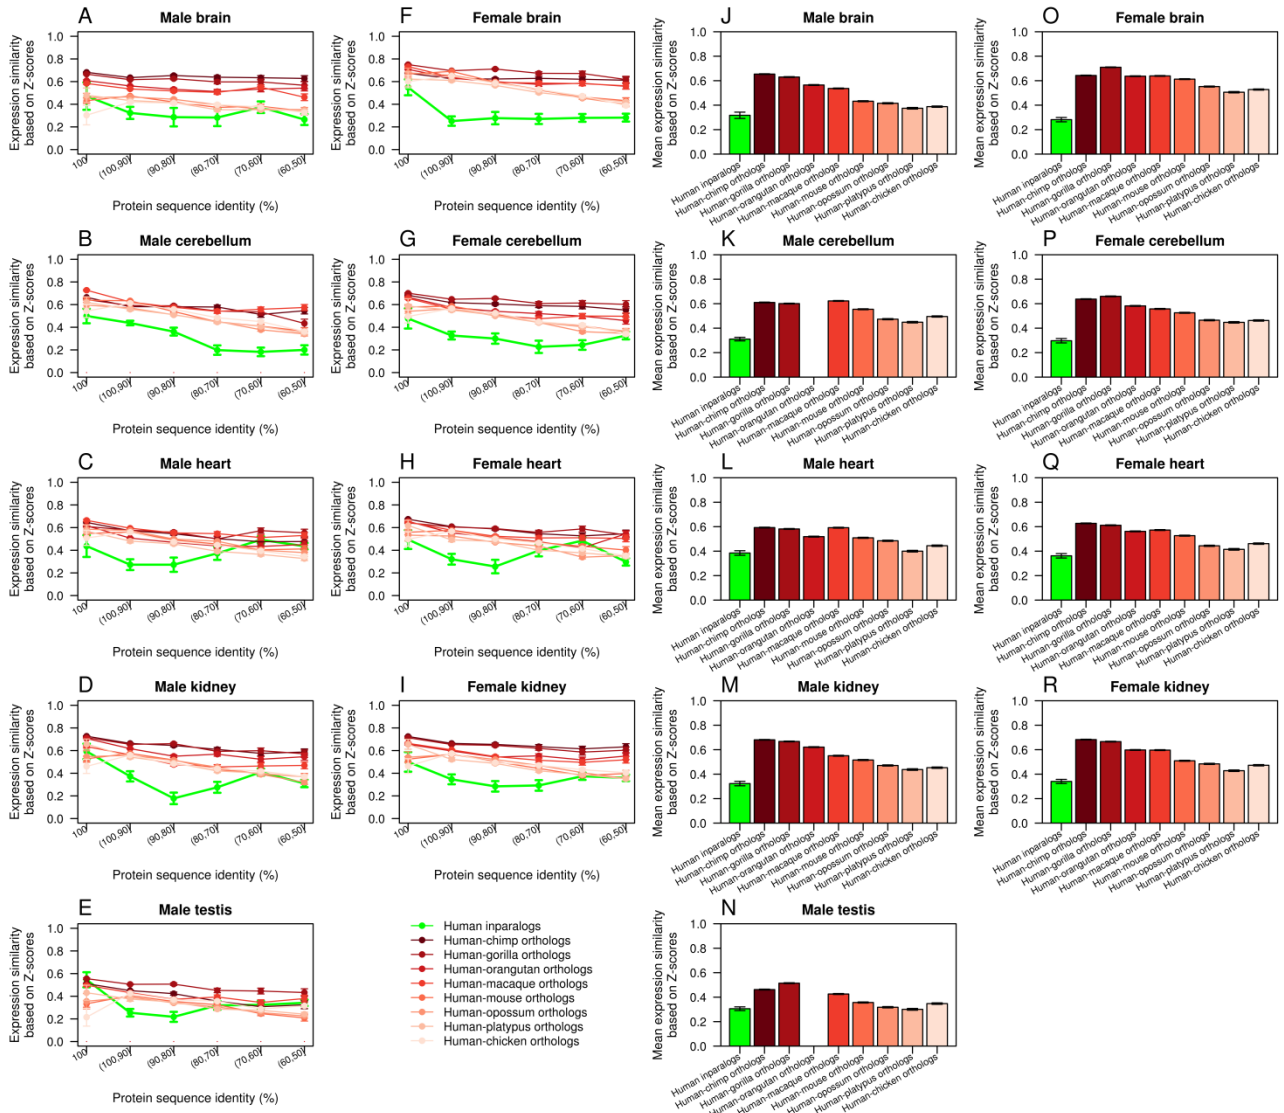

Figure S6
